# Supplementary material for: The Architectural Chromatin Factor High Mobility Group A1 Enhances DNA Ligase IV Activity Influencing DNA Repair
Source: PubMed Central journal article supplement (PMC5056749; doi:10.1371/journal.pone.0164258), 2016-10-10

# Supporting Figure 2

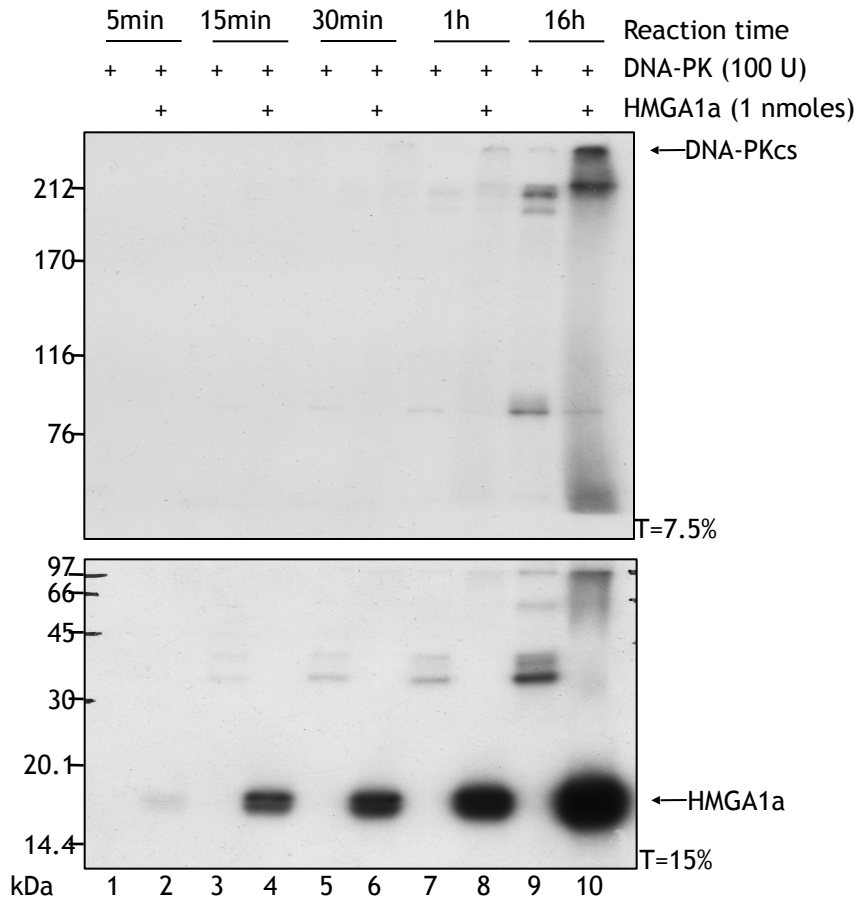

Supplement: pone.0164258.s002.pdf [file pone.0164258.s002.pdf]
