# Supplementary material for: The Architectural Chromatin Factor High Mobility Group A1 Enhances DNA Ligase IV Activity Influencing DNA Repair
Source: PubMed Central journal article supplement (PMC5056749; doi:10.1371/journal.pone.0164258), 2016-10-10
Supplement: pone.0164258.s003.pdf [file pone.0164258.s003.pdf]

## Supplementary MS Data: HMGA1a FL – LC–MS/MS analysis data (summary)

a) HMGA1a aminoacidic sequence (S/T residues evidenced in red, SQ consensus sites evidenced in blue)

**SESSSKSQP LASKQEKDGT EKRGRGRPRK QPPVSPGTAL VGSQKEPSEV PTPKRPRGRP  
KGSKNKGA AK TRKTTTTTPGR KPRGRPKKLE KEEEGISQE SSEEEQ**

b) Peptides detected in LC–MS/MS analysis (HMGA1a full length (FL) tryptic digestion – Mascot search results). The phosphorylation sites assigned by Mascot are evidenced in green.

| Observed | Mr(expt)  | Mr(calc)  | Score | Expect  | Peptide (aa start–stop position)           |
|----------|-----------|-----------|-------|---------|--------------------------------------------|
| 367.13   | 732.2454  | 732.3766  | 16    | 0.43    | K.TTTTTPGR.K (74–80)                       |
| 409.16   | 816.3054  | 816.4341  | 57    | 0.00046 | K.SSQPLASK.Q (7–14)                        |
| 418.15   | 834.2854  | 834.2830  | 11    | 0.82    | MSESSSK.S + P (Nter-6)                     |
| 861.25   | 860.2427  | 860.4716  | 3     | 1.1     | R.KTTTTTPGR.K (73–80)                      |
| 431.15   | 860.2854  | 860.4716  | 18    | 1.2     | R.KTTTTTPGR.K (73–80)                      |
| 449.15   | 896.2854  | 896.4004  | 31    | 0.19    | K.SSQPLASK.Q + P (7–14)                    |
| 492.22   | 982.4254  | 982.4971  | 40    | 0.01    | K.EPSEVPTPK.R (46–54)                      |
| 532.22   | 1062.4254 | 1062.4634 | 37    | 0.031   | K.EPSEVPTPK.R + P (46–54)                  |
| 558.58   | 1672.7182 | 1672.8549 | 6     | 2.3     | R.KQPPVSPGTALVGSQK.E + P (30–45)           |
| 733.33   | 1464.6454 | 1464.7937 | 50    | 0.00014 | K.QPPVSPGTALVGSQK.E (31–45)                |
| 489.23   | 1464.6682 | 1464.7937 | 21    | 0.57    | K.QPPVSPGTALVGSQK.E (31–45)                |
| 773.31   | 1544.6054 | 1544.7600 | 57    | 2.6e-05 | K.QPPVSPGTALVGSQK.E + P (31–45)            |
| 531.89   | 1592.6482 | 1592.8886 | 48    | 0.0021  | R.KQPPVSPGTALVGSQK.E (30–45)               |
| 837.35   | 1672.6882 | 1672.8549 | 51    | 0.00016 | R.KQPPVSPGTALVGSQK.E + P (30–45)           |
| 869.74   | 1737.4654 | 1737.6700 | 97    | 4.8e-08 | K.EEEEGISQESSEEEQ.- (92–Cter)              |
| 580.18   | 1737.5182 | 1737.6700 | 43    | 0.0047  | K.EEEEGISQESSEEEQ.- (92–Cter)              |
| 906.66   | 2716.9582 | 2717.3078 | 16    | 0.26    | R.KQPPVSPGTALVGSQKEPSEVPTPK.R + 2P (30–54) |
| 703.57   | 2107.6882 | 2107.8916 | 55    | 0.00028 | K.LEKEEEEGISQESSEEEQ.- (89–106)            |
| 746.27   | 2235.7882 | 2235.9866 | 71    | 2.2e-05 | K.LEKEEEEGISQESSEEEQ.- (88–106)            |
| 837.34   | 2508.9982 | 2509.2465 | 52    | 5.2e-05 | K.QPPVSPGTALVGSQKEPSEVPTPK.R + P (31–54)   |
| 880.03   | 2637.0682 | 2637.3415 | 50    | 0.0002  | R.KQPPVSPGTALVGSQKEPSEVPTPK.R + P (30–54)  |

c) Peptide intensities (cps) extracted by LC–MS/MS analysis by generating extracted ion chromatograms (EIC) for each indicated m/z value. Most probable phosphorylated site (Mascot site analysis) evidenced in green. HMGA1a FL analysis.

| m/z    | z | peptide | Phosphate | Sequence                  | Intensity (cps) | Relative intensity |
|--------|---|---------|-----------|---------------------------|-----------------|--------------------|
| 409.16 | 2 | 7–14    | 0         | SSQPLASK                  | 413192960       | 100                |
| 449.15 | 2 |         | 1         |                           | 136824048       | 33                 |
| 492.22 | 2 | 46–54   | 0         | EPSEVPTPK                 | 1148811776      | 100                |
| 532.22 | 2 |         | 1         |                           | 55826432        | 4.9                |
| 733.33 | 2 | 31–45   | 0         | QPPVSPGTALVGSQK           | 551830464       | 100                |
| 773.31 | 2 |         | 1         |                           | 32568356        | 5.9                |
| 797.35 | 2 | 30–45   | 0         | KQPPVSPGTALVGSQK          | 150227632       | 100                |
| 837.35 | 2 |         | 1         |                           | 142235120       | 95                 |
| 869.74 | 2 | 92–106  | 0         | EEEEGISQESSEEEQ           | 126906968       | 100                |
| 909.74 | 2 |         | 1         |                           | 15437390        | 12.2               |
| 853.36 | 3 | 30–54   | 0         | KQPPVSPGTALVGSQKEPSEVPTPK | nd              | 0                  |
| 880.03 | 3 |         | 1         |                           | 264766768       | 100                |
| 810.67 | 3 | 31–54   | 0         | QPPVSPGTALVGSQKEPSEVPTPK  | nd              | 0                  |
| 837.34 | 3 |         | 1         |                           | 83190216        | 100                |

d) Example of phosphorylation site assignment by Mascot analysis

Peptide K.QPPVSPGTALVGSQK.E + P (31–45), Mr(calc): 1544.76, Variable modifications: pS13 (number refers to the position within the peptide), Matches : 63/240 fragment ions using 78 most intense peaks.

| Score | Mr(calc) | Delta   | Sequence                      | Site analysis |
|-------|----------|---------|-------------------------------|---------------|
| 57.2  | 1544.76  | -0.1545 | QPPVSPGTALVGP <sup>S</sup> QK | S13 99.82%    |
| 29.2  |          |         | QPPVSPG <sup>p</sup> TALVGSQK | T8 0.16%      |
| 20.9  |          |         | QPPV <sup>p</sup> SPGTALVGSQK | S5 0.02%      |

## Supplementary MS Data: HMGA2 FL – LC–MS/MS analysis data (summary)

a) HMGA2 aminoacidic sequence (S/T residues evidenced in red, SQ consensus sites evidenced in blue)

**S**ARGEGAGQP **ST**SAQQQPAA PAPQKRGRGR PRKQQQEPTG EPSPKRPRGR PKGSKNKSPS  
KAAQKKA**EAT** GEKRPRGRPR KWPQQVVQKK PAQEETE**TS** SQESA**EED**

b) Peptides detected in LC–MS/MS analysis (HMGA2 full length (FL) tryptic digestion – Mascot search results). The phosphorylation sites assigned by Mascot are evidenced in green.

| Observed | Mr(expt)  | Mr(calc)  | Score | Expected | Peptide (aa start–stop position)               |
|----------|-----------|-----------|-------|----------|------------------------------------------------|
| 417.20   | 832.3854  | 832.4290  | 46    | 0.0052   | K.KAEATGEK.R (66–73)                           |
| 506.72   | 1011.4254 | 1011.5502 | 33    | 0.089    | K.WPQQVVQK.K (82–89)                           |
| 380.83   | 1139.4682 | 1139.6451 | 36    | 0.09     | R.KWPQQVVQK.K (81–89)                          |
| 570.81   | 1139.6054 | 1139.6451 | 30    | 0.07     | R.KWPQQVVQK.K (81–89)                          |
| 663.32   | 1324.6254 | 1324.6259 | 23    | 0.036    | K.QQQEPTGEPSPK.R (34–45)                       |
| 485.20   | 1452.5782 | 1452.7209 | 30    | 0.24     | R.KQQQEPTGEPSPK.R (33–45)                      |
| 727.30   | 1452.5854 | 1452.7209 | 63    | 3.7e-05  | R.KQQQEPTGEPSPK.R (33–45)                      |
| 735.60   | 2203.7782 | 2202.8325 | 28    | 0.011    | K.KPAQEETEETSSQESA <b>EED</b> .- + P (90–Cter) |
| 767.34   | 1532.6654 | 1532.6872 | 33    | 0.028    | R.KQQQEPTGEPSPK.R + P (33–45)                  |
| 678.94   | 2033.7982 | 2033.9766 | 56    | 0.00031  | R.GEGAGQPSTSAQQQPAAPAPQK.R (4–25)              |
| 1017.94  | 2033.8654 | 2033.9766 | 92    | 2.5e-08  | R.GEGAGQPSTSAQQQPAAPAPQK.R (4–25)              |
| 708.60   | 2122.7782 | 2122.8662 | 73    | 5.5e-07  | K.KPAQEETEETSSQESA <b>EED</b> .- (90–Cter)     |
| 735.21   | 2202.6082 | 2202.8325 | 27    | 0.011    | K.KPAQEETEETSSQESA <b>EED</b> .- + P (90–Cter) |
| 1102.36  | 2202.7054 | 2202.8325 | 78    | 2.4e-07  | K.KPAQEETEETSSQESA <b>EED</b> .- + P (90–Cter) |
| 735.25   | 2202.7282 | 2202.8325 | 45    | 0.0024   | K.KPAQEETEETSSQESA <b>EED</b> .- + P (90–Cter) |

c) Peptide intensities (cps) extracted by LC–MS/MS analysis by generating extracted ion chromatograms (EIC) for each indicated m/z value. Most probable phosphorylated site (Mascot site analysis) evidenced in green. HMGA2 FL analysis.

| m/z    | z | peptide | Phosphate | Sequence                    | Intensity (cps) | Relative intensity |
|--------|---|---------|-----------|-----------------------------|-----------------|--------------------|
| 727.30 | 2 | 33–45   | 0         | KQQQEPTGEPSPK               | 61564724        | 100                |
| 767.34 | 2 |         | 1         |                             | 9513640         | 15.45              |
| 485.20 | 3 | 33–45   | 0         | KQQQEPTGEPSPK               | 153117008       | 100                |
| 511.88 | 3 |         | 1         |                             | 7362616         | 4.8                |
| 708.60 | 3 | 90–108  | 0         | KPAQEETEETSSQESA <b>EED</b> | 31226180        | 32.8               |
| 735.21 | 3 |         | 1         |                             | 95052592        | 100                |

d) Examples of phosphorylation site assignment by Mascot analysis

Peptide R.KQQQEPTGEPSPK.R + P (33–45), Mr(calc): 1532.68, Variable modifications: pS11 (number refers to the position within the peptide), Matches : 50/204 fragment ions using 83 most intense peaks.

| Score | Mr(calc) | Delta   | Sequence                | Site analysis |
|-------|----------|---------|-------------------------|---------------|
| 33.3  | 1532.68  | –0.0217 | KQQQEPTGEP <b>p</b> SPK | S11 99.42%    |
| 10.9  | 1532.68  | –0.0217 | KQQQEP <b>p</b> TGEPSPK | T8 0.16%      |

Peptide K.KPAQEETEETSSQESA**EED**.- + P (90–Cter), Mr(calc): 2202.8325, Variable modifications: pS12 (number refers to the position within the peptide), Matches : 49/304 fragment ions using 65 most intense peaks.

| Score | Mr(calc) | Delta    | Sequence                               | Site analysis |
|-------|----------|----------|----------------------------------------|---------------|
| 78.0  | 2202.83  | –0.01270 | KPAQEETEET <b>p</b> SSQESA <b>EED</b>  | S12 90.10     |
| 66.5  |          |          | KPAQEETEET <b>p</b> SSQESA <b>EED</b>  | S11 6.32%     |
| 62.2  |          |          | KPAQEETEET <b>p</b> TSSQESA <b>EED</b> | T10 2.38%     |
| 59.2  |          |          | KPAQEETEETSSQEP <b>p</b> SA <b>EED</b> | S15 1.18%     |
| 41.2  |          |          | KPAQEE <b>p</b> TEETSSQESA <b>EED</b>  | T7 0.02%      |

Peptide K.KPAQEETEETSSQESA**EED**.- + P (90–Cter), Mr(calc): 2202.8325, Variable modifications: pS15 (number refers to the position within the peptide), Matches : 49/300 fragment ions using 80 most intense peaks.

| Score | Mr(calc) | Delta    | Sequence                               | Site analysis |
|-------|----------|----------|----------------------------------------|---------------|
| 26.9  | 2202.83  | –0.01270 | KPAQEETEETSSQEP <b>p</b> SA <b>EED</b> | S15 44.02     |
| 26.4  |          |          | KPAQEETEET <b>p</b> SSQESA <b>EED</b>  | S12 38.87     |
| 21.2  |          |          | KPAQEETEET <b>p</b> SSQESA <b>EED</b>  | S11 11.77     |
| 17.6  |          |          | KPAQEETEET <b>p</b> TSSQESA <b>EED</b> | T10 5.14      |

# DNA-PK tryptic digestion and LC-MS/MS analysis – Mascot Search Results

| Observed               | Mr(expt)   | Mr(calc)                                                                | Delta   | Score | Expect  | Peptide                         |
|------------------------|------------|-------------------------------------------------------------------------|---------|-------|---------|---------------------------------|
| <b>1) ROA1_HUMAN</b>   | <b>279</b> | <b>Heterogeneous nuclear ribonucleoprotein A1</b>                       |         |       |         |                                 |
| 525.2500               | 1048.4854  | 1048.4502                                                               | 0.0353  | 45    | 0.0044  | R.DYFEQYGK.I                    |
| 609.8100               | 1217.6054  | 1217.6326                                                               | -0.0271 | 80    | 3.3e-06 | K.IEVIEIMTDR.G                  |
| 719.3900               | 1436.7654  | 1436.7372                                                               | 0.0283  | 22    | 0.1     | R.EDSQRPGAHLTVK.K               |
| 847.5200               | 1693.0254  | 1693.6928                                                               | -0.6674 | 104   | 3.8e-09 | R.NQGGYGGSSSSSSSYGSGR.R         |
| 850.4200               | 1698.8254  | 1698.7526                                                               | 0.0728  | 68    | 6.6e-06 | R.GFAFVTFDDHDSVDK.I             |
| 892.9600               | 1783.9054  | 1783.8992                                                               | 0.0062  | 115   | 3.6e-10 | K.LFIGGLSFETTDESLS.R            |
| <b>2) PRKDC_HUMAN</b>  | <b>203</b> | <b>DNA-dependent protein kinase catalytic subunit</b>                   |         |       |         |                                 |
| 446.2600               | 890.5054   | 891.4450                                                                | -0.9396 | 14    | 0.39    | K.AAYLSDPR.A                    |
| 492.7500               | 983.4854   | 983.4437                                                                | 0.0417  | 112   | 3.2     | R.ASGEVRTGK.W + P (ST)          |
| 498.3100               | 994.6054   | 994.6426                                                                | -0.0372 | 39    | 0.008   | K.IPALDLLIK.L                   |
| 506.8000               | 1011.5854  | 1011.5865                                                               | -0.0011 | 24    | 0.19    | K.FVPLLPGNR.S                   |
| 568.3400               | 1134.6654  | 1134.6033                                                               | 0.0621  | 46    | 0.0027  | R.HGDLDPDIQIK.H                 |
| 582.3600               | 1162.7054  | 1162.6185                                                               | 0.0869  | 12    | 5.1     | R.ICSKPVVLPK.G + P (ST)         |
| 647.3200               | 1292.6254  | 1292.6725                                                               | -0.0470 | 42    | 0.0041  | R.DQNILLGTTYR.I                 |
| 698.9200               | 1395.8254  | 1395.6882                                                               | 0.1373  | 55    | 0.00017 | K.LNESTFDTQITK.K                |
| 722.9400               | 1443.8354  | 1443.8337                                                               | 0.0318  | 97    | 6.6e-08 | K.NLLIFENLIDLK.R                |
| 752.4100               | 1502.8054  | 1502.6525                                                               | 0.1529  | 9     | 3       | K.QDWVDGEPTEAEK.D               |
| 848.5000               | 1694.9854  | 1694.9131                                                               | 0.0723  | 87    | 3e-07   | R.EFFSTIVVDAIDVLK.S             |
| 737.7200               | 2210.1382  | 2210.1136                                                               | 0.0245  | 9     | 2       | R.EFLKWSIKQITPQQQEK.S + P (ST)  |
| 752.7900               | 2255.3482  | 2254.9313                                                               | 0.4168  | 6     | 3.1     | K.SRFTKLNSTFDTQITK.K + 3 (ST)   |
| <b>3) GCN1L_HUMAN</b>  | <b>119</b> | <b>Translational activator GCN1</b>                                     |         |       |         |                                 |
| 638.1200               | 1911.3382  | 1911.0201                                                               | 0.3181  | 28    | 0.026   | K.VLPLEALVTDAGEVTEAGK.A         |
| 802.5800               | 1603.1454  | 1603.9548                                                               | -0.8094 | 39    | 0.005   | K.ILPEIIPILEEGLR.S              |
| 707.1200               | 2118.3382  | 2117.1732                                                               | 1.1650  | 47    | 0.00023 | R.NPEILAIAPVLLDALTDPSR.K        |
| 746.4400               | 2236.2982  | 2236.2566                                                               | 0.0416  | 89    | 3.2e-07 | R.LQELDGELEAALGLLDIILAK.N       |
| <b>4) ALBU_HUMAN</b>   | <b>112</b> | <b>Serum albumin</b>                                                    |         |       |         |                                 |
| 464.2900               | 926.5654   | 926.4861                                                                | 0.0793  | 31    | 0.061   | K.YLYEIAR.R                     |
| 609.8100               | 1217.6054  | 1217.5264                                                               | 0.0791  | 14    | 15      | K.CASLQKFGGER.A + P (ST)        |
| 756.4200               | 1510.8254  | 1510.8355                                                               | -0.0101 | 37    | 0.0042  | K.VPQVSTPTLVEVSR.N              |
| 547.3300               | 1638.9682  | 1638.9305                                                               | 0.0377  | 53    | 0.00018 | K.KVPQVSTPTLVEVSR.N             |
| 820.5100               | 1639.0054  | 1638.9305                                                               | 0.0750  | 75    | 5.9e-07 | K.KVPQVSTPTLVEVSR.N             |
| <b>5) H10_HUMAN</b>    | <b>86</b>  | <b>Histone H1.0</b>                                                     |         |       |         |                                 |
| 530.2400               | 1058.4654  | 1059.5196                                                               | -1.0542 | 19    | 0.24    | K.VGENADSQIK.L                  |
| 651.3000               | 1300.5854  | 1300.6623                                                               | -0.0768 | 72    | 4.9e-06 | M.TENSTSAPAAKPK.R               |
| <b>6) HNRPD_HUMAN</b>  | <b>85</b>  | <b>Heterogeneous nuclear ribonucleoprotein D0</b>                       |         |       |         |                                 |
| 744.9000               | 1487.7854  | 1487.7508                                                               | 0.0347  | 85    | 2.9e-07 | K.IFVGGLSPDTPPEEK.I             |
| <b>7) E2AK2_HUMAN</b>  | <b>82</b>  | <b>Interferon-induced, double-stranded RNA-activated protein kinase</b> |         |       |         |                                 |
| 702.4400               | 1402.8654  | 1402.8071                                                               | 0.0583  | 82    | 3.4e-07 | K.VLALFELFEQITK.G               |
| <b>8) NONO_HUMAN</b>   | <b>67</b>  | <b>Non-POU domain-containing octamer-binding protein</b>                |         |       |         |                                 |
| 543.2400               | 1084.4654  | 1085.5539                                                               | -1.0885 | 49    | 0.00044 | K.VELDNMPLR.G                   |
| 890.1100               | 2667.3082  | 2667.3180                                                               | -0.0099 | 50    | 0.0024  | R.NLPQYVSNELLEEEAFSVFGQVER.A    |
| <b>9) DDX17_HUMAN</b>  | <b>66</b>  | <b>Probable ATP-dependent RNA helicase DDX17</b>                        |         |       |         |                                 |
| 613.4100               | 1224.8054  | 1225.7030                                                               | -0.8976 | 66    | 7.3e-05 | K.APILIATDVASR.G                |
| <b>10) EF1A1_HUMAN</b> | <b>57</b>  | <b>Elongation factor 1-alpha 1</b>                                      |         |       |         |                                 |
| 488.3200               | 974.6254   | 974.5437                                                                | 0.0818  | 57    | 0.0006  | R.LPLQDVYK.I                    |
| 733.7200               | 2198.1382  | 2199.0517                                                               | -0.9136 | 10    | 1.2     | K.MDSTPEPPYSQKRYEEIVK.E         |
| <b>11) XRCC6_HUMAN</b> | <b>47</b>  | <b>X-ray repair cross-complementing protein 6</b>                       |         |       |         |                                 |
| 503.3400               | 1004.6654  | 1004.5542                                                               | 0.1112  | 47    | 0.0051  | R.ILELDQFK.G                    |
| 677.8800               | 1353.7454  | 1353.7180                                                               | 0.0274  | 15    | 0.26    | R.DLLAVVFGTEK.D                 |
| 782.0300               | 2343.0682  | 2343.1634                                                               | -0.0953 | 19    | 0.77    | R.NIPPYFVALVPQEEELDDQK.I        |
| <b>12) HNRPQ_HUMAN</b> | <b>45</b>  | <b>Heterogeneous nuclear ribonucleoprotein Q</b>                        |         |       |         |                                 |
| 587.3300               | 586.3227   | 587.3027                                                                | -0.9800 | 1     | 0.81    | R.GGNVGGK.R                     |
| 797.4200               | 1592.8254  | 1592.7974                                                               | 0.0281  | 45    | 0.0022  | R.DLFEDELVPLFEK.A               |
| <b>13) CAND1_HUMAN</b> | <b>43</b>  | <b>Cullin-associated NEDD8-dissociated protein 1</b>                    |         |       |         |                                 |
| 522.8600               | 1043.7054  | 1042.6209                                                               | 1.0846  | 4     | 1.8     | K.CLGPLVSKVK.E                  |
| 503.8700               | 1508.5882  | 1509.6663                                                               | -1.0781 | 43    | 0.0046  | R.ATCTTKVKANSVK.Q + 2 P (ST)    |
| 822.3300               | 1642.6454  | 1642.7426                                                               | -0.0971 | 8     | 1.1     | -.MASASYHISNLLLEK.M + P (ST)    |
| <b>14) DNJC2_HUMAN</b> | <b>39</b>  | <b>DnaJ homolog subfamily C member 2</b>                                |         |       |         |                                 |
| 823.9200               | 1645.8254  | 1645.7777                                                               | 0.0478  | 39    | 0.00047 | K.DNFFEVFTPVFER.N               |
| <b>15) HNRPL_HUMAN</b> | <b>37</b>  | <b>Heterogeneous nuclear ribonucleoprotein L</b>                        |         |       |         |                                 |
| 454.2500               | 906.4854   | 906.4494                                                                | 0.0360  | 32    | 0.023   | R.MGPPVGGHR.R                   |
| 501.7500               | 1001.4854  | 1001.4203                                                               | 0.0652  | 28    | 0.008   | R.YYGGGSEGGR.A                  |
| <b>16) MSH2_HUMAN</b>  | <b>33</b>  | <b>DNA mismatch repair protein Msh2</b>                                 |         |       |         |                                 |
| 785.9900               | 1569.9654  | 1569.9494                                                               | 0.0160  | 33    | 0.0062  | K.LLLAVFVTPLTLDR.S              |
| 788.3000               | 1574.5854  | 1574.8780                                                               | -0.2926 | 6     | 2.4     | K.DIYQDLNRLKKGK.K               |
| <b>17) HMGA2_HUMAN</b> | <b>31</b>  | <b>High mobility group protein HMGI-C</b>                               |         |       |         |                                 |
| 570.8600               | 1139.7054  | 1139.6451                                                               | 0.0603  | 31    | 0.03    | R.KWPQQVVQK.K                   |
| 727.3400               | 1452.6654  | 1452.7209                                                               | -0.0554 | 25    | 0.12    | R.KQQQEPTGEPSPK.R               |
| <b>18) CAPR1_HUMAN</b> | <b>26</b>  | <b>Caprin-1</b>                                                         |         |       |         |                                 |
| 660.3800               | 1318.7454  | 1319.7337                                                               | -0.9882 | 26    | 0.052   | K.TVLELQYVLDK.L                 |
| <b>19) HEMGN_HUMAN</b> | <b>23</b>  | <b>Hemogen</b>                                                          |         |       |         |                                 |
| 505.3000               | 1008.5854  | 1008.4529                                                               | 0.1326  | 23    | 0.047   | K.TEPPGSITK.V + Phospho (ST)    |
| <b>20) SFPQ_HUMAN</b>  | <b>20</b>  | <b>Splicing factor, proline- and glutamine-rich</b>                     |         |       |         |                                 |
| 625.8900               | 1874.6482  | 1874.9992                                                               | -0.3510 | 10    | 0.91    | R.QLRVRFATHAAALSVR.N + P (ST)   |
| 671.8000               | 1341.5854  | 1340.6586                                                               | 0.9269  | 20    | 0.047   | R.FGQGGAGPVGGQGR.G              |
| 746.6600               | 2236.9582  | 2235.8816                                                               | 1.0766  | 7     | 0.88    | R.FAQHGTFEYEYSQRWK.S + 2 P (ST) |

## Supplementary References regarding the proteins identified with DNA–PK tryptic digestion and LC–MS/MS analysis that have a link with DNA–PK.

### Heterogeneous nuclear ribonucleoprotein A1:

1: Ting NS, Pohorelic B, Yu Y, Lees-Miller SP, Beattie TL. The human telomerase RNA component, hTR, activates the DNA-dependent protein kinase to phosphorylate heterogeneous nuclear ribonucleoprotein A1. *Nucleic Acids Res.* 2009 Oct;37(18):6105-15. doi: 10.1093/nar/gkp636. Epub 2009 Aug 5. PubMed PMID:19656952; PubMed Central PMCID: PMC2764450.

2: Sui J, Lin YF, Xu K, Lee KJ, Wang D, Chen BP. DNA-PKcs phosphorylates hnRNP-A1 to facilitate the RPA-to-POT1 switch and telomere capping after replication. *Nucleic Acids Res.* 2015 Jul 13;43(12):5971-83. doi: 10.1093/nar/gkv539. Epub 2015 May 20. PubMed PMID: 25999341.

### Histone H1.0

1: Rosidi B, Wang M, Wu W, Sharma A, Wang H, Iliakis G. Histone H1 functions as a stimulatory factor in backup pathways of NHEJ. *Nucleic Acids Res.* 2008 Mar;36(5):1610-23. doi: 10.1093/nar/gkn013. Epub 2008 Feb 3. PubMed PMID: 18250087; PubMed Central PMCID: PMC2275134.

2: Kysela B, Chovanec M, Jeggo PA. Phosphorylation of linker histones by DNA-dependent protein kinase is required for DNA ligase IV-dependent ligation in the presence of histone H1. *Proc Natl Acad Sci U S A.* 2005 Feb 8;102(6):1877-82. Epub 2005 Jan 25. PubMed PMID: 15671175; PubMed Central PMCID: PMC548527.

### Non-POU domain-containing octamer-binding protein and Splicing factor, proline- and glutamine-rich

1) Bladen CL, Udayakumar D, Takeda Y, Dynan WS. Identification of the polypyrimidine tract binding protein-associated splicing factor.p54(nrb) complex as a candidate DNA double-strand break rejoining factor. *J Biol Chem.* 2005 Feb 18;280(7):5205-10. Epub 2004 Dec 7. PubMed PMID: 15590677.

2) Udayakumar D, Dynan WS. Characterization of DNA binding and pairing activities associated with the native SFPQ·NONO DNA repair protein complex. *Biochem Biophys Res Commun.* 2015 Aug 7;463(4):473-8. doi: 10.1016/j.bbrc.2015.05.024. Epub 2015 May 18. PubMed PMID: 25998385; PubMed Central PMCID: PMC4497844.
